# Supplementary material for: A highly efficient Ga/ZSM-5 catalyst prepared by formic acid impregnation and in situ treatment for propane aromatization
Source: Royal Society of Chemistry journal article supplement (doi:10.1039/c5cy00665a), 2015-01-01
Supplement: c5cy00665a1.pdf [file c5cy00665a1.pdf]

*Supporting Information for*

A highly efficient Ga/ZSM-5 catalyst prepared by formic acid  
impregnation and *in-situ* treatment for propane aromatization

He Xiao,<sup>a,b</sup> Junfeng Zhang,<sup>a</sup> Xiaoxing Wang,<sup>a</sup> Qingde Zhang,<sup>a</sup> Hongjuan Xie,<sup>a</sup> Yizhuo Han,<sup>a</sup>  
and Yisheng Tan <sup>\*a</sup>

a. State Key Laboratory of Coal Conversion, Institute of Coal Chemistry, Chinese Academy of  
Sciences, Taiyuan 030001, China;

b. University of Chinese Academy of Sciences, Beijing 100049, China

**\*Correspondence to: Yisheng Tan Prof.** E-mail: tan@sxicc.ac.cn. Tel:+86-351-4044287.

Fax:+86-351-4044287

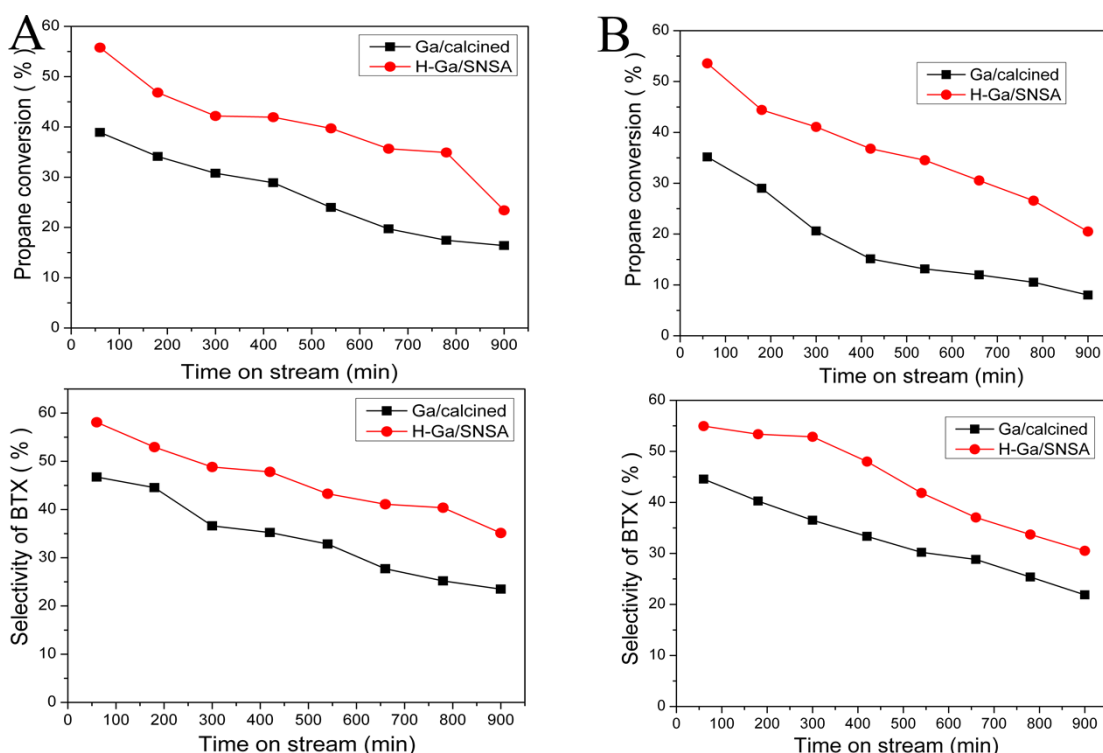

**Fig. S1** Propane conversion (A) and selectivity of BTX (B) as a function of time on stream for Ga/calcined and H-Ga/SNSA. Reaction conditions: P = 100 kPa, T = 540 °C, WHSV = 6000 ml/(g·h) and N<sub>2</sub>/C<sub>3</sub>H<sub>8</sub> molar ratio = 2.

The stability of H-Ga/SNSA catalyst is investigated in comparison with that of Ga/calcined during two cycles of 900 min time-on-stream shown in Fig. S1. As observed, propane conversion and selectivity of BTX over Ga/calcined are 38.9% and 46.7% at the initial stage of reaction. And the Ga/calcined exhibits gradual deactivation pattern as a function of time on stream. After 900 min, propane conversion and selectivity of BTX over Ga/calcined decrease to 16.3% and 23.4% respectively. While propane conversion (55.7%) and selectivity of BTX (58.1%) over H-Ga/SNSA are superior to those over Ga/calcined respectively, at the initial stage of reaction. Gradual deactivation pattern as a function of time on stream is also exhibited for H-Ga/SNSA. Propane conversion and selectivity of BTX over H-Ga/SNSA are

higher than that on Ga/calcined during the whole test period. It's obvious that deactivation performance easily occurs over H-Ga/SNSA and Ga/calcined because of rapid coke deposition under the conditions of large space velocity. Besides, activities of these catalysts are investigated after regeneration through a thermo-treatment to remove coke deposition at 540 °C in air (Fig.S1B). It can be seen that activities of H-Ga/SNSA and Ga/calcined can be recovered substantially. Meanwhile, stability patterns of H-Ga/SNSA and Ga/calcined are similar to that before regeneration as a function of time on stream. Furthermore, the propane conversion and selectivity of BTX over H-Ga/SNSA are still higher than those on Ga/calcined for the whole reaction time. The results revealed that H-Ga/SNSA and Ga/calcined both show analogous stability behavior under large space velocity conditions as a function of time on stream, but H-Ga/SNSA prepared using our proposed novel method shows better catalytic performance than Ga/calcined prepared using conventional impregnation method always during the whole test period. In addition, activities of H-Ga/SNSA and Ga/calcined could recover after regeneration, and the H-Ga/SNSA still shows super catalytic performance in comparison with Ga/calcined. The results of the durability and regeneration tests suggest that the catalyst crystals are reasonably stable under the conditions of the aromatization reaction. Although the H-Ga/SNSA does not exhibit the super stability like the way we imagined, H-Ga/SNSA shows super catalytic performance in comparison with Ga/calcined during the whole test period.

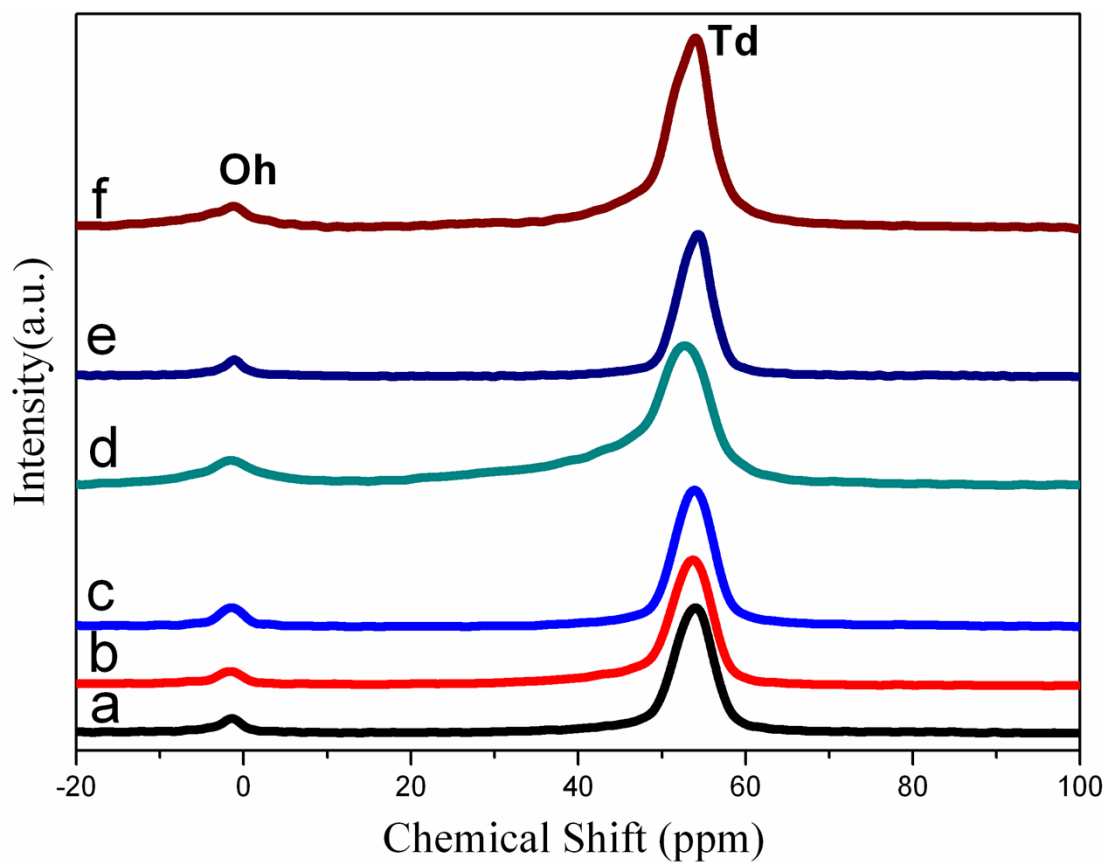

**Fig. S2**  $^{27}\text{Al}$  MAS NMR spectra of as-prepared ZSM-5 zeolites, showing four-coordinate framework Al peak (Td) and octahedral extra framework Al peak (Oh). (a) HZSM-5; (b) Ga/calcined; (c) Ga/dried; (d) Ga/SNSA; (e) H-Ga/dried; (f) H-Ga/SNSA

**Fig. S3** TG-MS profile of H-Ga/dried, showing water steam generated by self-decomposition of Ga species and other species during *in-situ* treatment process.

**Table S1** Summary of H<sub>2</sub>-TPR results of percentage composition for as-prepared samples. This table suggests the percentage compositions of (GaO)<sup>+</sup> on H-Ga/SNSA is higher than that on other catalysts.

| Samples                        | small Ga <sub>2</sub> O <sub>3</sub> particles (%) | (GaO) <sup>+</sup> species (%) | segregated bulk Ga <sub>2</sub> O <sub>3</sub> (%) |
|--------------------------------|----------------------------------------------------|--------------------------------|----------------------------------------------------|
| Ga <sub>2</sub> O <sub>3</sub> | 507(93.8)                                          | /                              | 771(6.18)                                          |
| Ga/calcined                    | 528(94.2)                                          | 671(2.40)                      | 810(3.28)                                          |
| Ga/SNSA                        | 533(69.8)                                          | 648(28.9)                      | 839(1.30)                                          |
| H-Ga/SNSA                      | 532(62.3)                                          | 650(37.3)                      | 822(0.360)                                         |
